# Supplementary material
Source: Copernicus journal article supplement (doi:10.5194/tc-20-2793-2026)
Supplement: Supplementary file [file tc-20-2793-2026-supplement-title-page.pdf › tc-20-2793-2026-supplement-title-page.pdf]

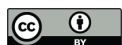

*Supplement of*

## **Radiostratigraphy and surface accumulation history of the Amundsen-Weddell Ice Divide, West Antarctica**

**Felipe Napoleoni et al.**

*Correspondence to:* Felipe Napoleoni ([felipe.napoleoni@ed.ac.uk](mailto:felipe.napoleoni@ed.ac.uk))

- [tc-20-2793-2026-supplement-title-page.pdf](#)
- [Napoleoni\\_etal2025\\_IRH.csv](#)

The copyright of individual parts of the supplement might differ from the article licence.
